# Supplementary material for: Cellular toxicity of expanded RNA repeats: focus on RNA foci
Source: PubMed Central journal article supplement — Hum Mol Genet. 2011 Jul 4;20(19):3811–21. doi: 10.1093/hmg/ddr299 (PMC3168290; doi:10.1093/hmg/ddr299), 2011-07-04
Supplement: supp_ddr299_ddr299supp.pdf [file supp_ddr299_ddr299supp.pdf]

## **SUPPLEMENTARY MATERIAL**

### **LEGENDS TO TABLES**

**Suppl. Table 1.** *Characteristics of the nuclear foci of expanded repeat RNAs and their protein constituents in DM1 and DM2 cells based on FISH and immunostaining analyses.*

h. (human); m. (mouse); NA (not analyzed)

**Suppl. Table 2.** *Characteristics of RNA repeat nuclear inclusions in SCA8, HDL2, FXTAS, SCA10, SCA31, and in CAG expressing cells based on FISH and immunostaining analyses.*

h. (human); m. (mouse); CR (combined repeats); NA (not analyzed)

**Suppl. Table 3.** *Characteristics of ribonuclear inclusions of mutant CUG repeats in DM1 Drosophila models based on FISH and immunostaining studies.*

NA (not analyzed)

### **SUPPLEMENTARY REFERENCES**

Taneja, K.L., McCurrach, M., Schalling, M., Housman, D. and Singer, R.H. (1995) Foci of trinucleotide repeat transcripts in nuclei of myotonic dystrophy cells and tissues. *J. Cell Biol.*, **128**, 995-1002.

Davis, B.M., McCurrach, M.E., Taneja, K.L., Singer, R.H. and Housman, D.E. (1997) Expansion of a CUG trinucleotide repeat in the 3' untranslated region of myotonic

dystrophy protein kinase transcripts results in nuclear retention of transcripts. *Proc. Natl. Acad. Sci. U. S. A.*, **94**, 7388-7393.

Taneja, K.L. (1998) Localization of trinucleotide repeat sequences in myotonic dystrophy cells using a single fluorochrome-labeled PNA probe. *Biotechniques*, **24**, 472-476.

Amack, J.D., Paguio, A.P. and Mahadevan, M.S. (1999) Cis and trans effects of the myotonic dystrophy (DM) mutation in a cell culture model. *Hum. Mol. Genet.*, **8**, 1975-1984.

Miller, J.W., Urbinati, C.R., Teng-Umnuay, P., Stenberg, M.G., Byrne, B.J., Thornton, C.A. and Swanson, M.S. (2000) Recruitment of human muscleblind proteins to (CUG)(n) expansions associated with myotonic dystrophy. *Embo J.*, **19**, 4439-4448.

Mankodi, A., Logigian, E., Callahan, L., McClain, C., White, R., Henderson, D., Krym, M. and Thornton, C.A. (2000) Myotonic dystrophy in transgenic mice expressing an expanded CUG repeat. *Science*, **289**, 1769-1773.

Furling, D., Coiffier, L., Mouly, V., Barbet, J.P., St Guily, J.L., Taneja, K., Gourdon, G., Junien, C. and Butler-Browne, G.S. (2001) Defective satellite cells in congenital myotonic dystrophy. *Hum. Mol. Genet.*, **10**, 2079-2087.

Mankodi, A., Urbinati, C.R., Yuan, Q.P., Moxley, R.T., Sansone, V., Krym, M., Henderson, D., Schalling, M., Swanson, M.S. and Thornton, C.A. (2001) Muscleblind localizes to nuclear foci of aberrant RNA in myotonic dystrophy types 1 and 2. *Hum. Mol. Genet.*, **10**, 2165-2170.

Seznec, H., Agbulut, O., Sergeant, N., Savouret, C., Ghestem, A., Tabti, N., Willer, J.C., Ourth, L., Duros, C., Brisson, E. *et al.* (2001) Mice transgenic for the human myotonic dystrophy region with expanded CTG repeats display muscular and brain abnormalities. *Hum. Mol. Genet.*, **10**, 2717-2726.

Langlois, M.A., Lee, N.S., Rossi, J.J. and Puymirat, J. (2003) Hammerhead ribozyme-mediated destruction of nuclear foci in myotonic dystrophy myoblasts. *Mol. Ther.*, **7**, 670-680.

Mankodi, A., Teng-Umnuay, P., Krym, M., Henderson, D., Swanson, M. and Thornton, C.A. (2003) Ribonuclear inclusions in skeletal muscle in myotonic dystrophy types 1 and 2. *Ann. Neurol.*, **54**, 760-768.

Jiang, H., Mankodi, A., Swanson, M.S., Moxley, R.T. and Thornton, C.A. (2004) Myotonic dystrophy type 1 is associated with nuclear foci of mutant RNA, sequestration of muscleblind proteins and deregulated alternative splicing in neurons. *Hum. Mol. Genet.*, **13**, 3079-3088.

Dansithong, W., Paul, S., Comai, L. and Reddy, S. (2005) MBNL1 is the primary determinant of focus formation and aberrant insulin receptor splicing in DM1. *J. Biol. Chem.*, **280**, 5773-5780.

Mankodi, A., Lin, X., Blaxall, B.C., Swanson, M.S. and Thornton, C.A. (2005) Nuclear RNA foci in the heart in myotonic dystrophy. *Circ. Res.*, **97**, 1152-1155.

Lin, X., Miller, J.W., Mankodi, A., Kanadia, R.N., Yuan, Y., Moxley, R.T., Swanson, M.S. and Thornton, C.A. (2006) Failure of MBNL1-dependent post-natal splicing transitions in myotonic dystrophy. *Hum. Mol. Genet.*, **15**, 2087-2097.

Mahadevan, M.S., Yadava, R.S., Yu, Q., Balijepalli, S., Frenzel-McCardell, C.D., Bourne, T.D. and Phillips, L.H. (2006) Reversible model of RNA toxicity and cardiac conduction defects in myotonic dystrophy. *Nat. Genet.*, **38**, 1066-1070.

Cardani, R., Mancinelli, E., Rotondo, G., Sansone, V. and Meola, G. (2006) Muscleblind-like protein 1 nuclear sequestration is a molecular pathology marker of DM1 and DM2. *Eur. J. Histochem.*, **50**, 177-182.

Paul, S., Dansithong, W., Kim, D., Rossi, J., Webster, N.J., Comai, L. and Reddy, S. (2006) Interaction of muscleblind, CUG-BP1 and hnRNP H proteins in DM1-associated aberrant IR splicing. *Embo J.*, **25**, 4271-4283.

Wheeler, T.M., Lueck, J.D., Swanson, M.S., Dirksen, R.T. and Thornton, C.A. (2007) Correction of CIC-1 splicing eliminates chloride channelopathy and myotonia in mouse models of myotonic dystrophy. *J. Clin. Invest.*, **117**, 3952-3957.

Guiraud-Dogan, C., Huguet, A., Gomes-Pereira, M., Brisson, E., Bassez, G., Junien, C. and Gourdon, G. (2007) DM1 CTG expansions affect insulin receptor isoforms expression in various tissues of transgenic mice. *Biochim. Biophys. Acta*, **1772**, 1183-1191.

Wang, G.S., Kearney, D.L., De Biasi, M., Taffet, G. and Cooper, T.A. (2007) Elevation of RNA-binding protein CUGBP1 is an early event in an inducible heart-specific mouse model of myotonic dystrophy. *J. Clin. Invest.*, **117**, 2802-2811.

Smith, K.P., Byron, M., Johnson, C., Xing, Y. and Lawrence, J.B. (2007) Defining early steps in mRNA transport: mutant mRNA in myotonic dystrophy type I is blocked at entry into SC-35 domains. *J. Cell Biol.*, **178**, 951-964.

Holt, I., Mittal, S., Furling, D., Butler-Browne, G.S., Brook, J.D. and Morris, G.E. (2007) Defective mRNA in myotonic dystrophy accumulates at the periphery of nuclear splicing speckles. *Genes Cells*, **12**, 1035-1048.

Botta, A., Rinaldi, F., Catalli, C., Vergani, L., Bonifazi, E., Romeo, V., Loro, E., Viola, A., Angelini, C. and Novelli, G. (2008) The CTG repeat expansion size correlates with the

splicing defects observed in muscles from myotonic dystrophy type 1 patients. *J. Med. Genet.*, **45**, 639-646.

Dansithong, W., Wolf, C.M., Sarkar, P., Paul, S., Chiang, A., Holt, I., Morris, G.E., Branco, D., Sherwood, M.C., Comai, L. *et al.* (2008) Cytoplasmic CUG RNA foci are insufficient to elicit key DM1 features. *PLoS One*, **3**, e3968.

Cardani, R., Mancinelli, E., Saino, G., Bonavina, L. and Meola, G. (2008) A putative role of ribonuclear inclusions and MBNL1 in the impairment of gallbladder smooth muscle contractility with cholelithiasis in myotonic dystrophy type 1. *Neuromuscul Disord.*, **18**, 641-645.

Warf, M.B., Nakamori, M., Matthys, C.M., Thornton, C.A. and Berglund, J.A. (2009) Pentamidine reverses the splicing defects associated with myotonic dystrophy. *Proc. Natl. Acad. Sci. U. S. A.*, **106**, 18551-18556.

Wheeler, T.M., Sobczak, K., Lueck, J.D., Osborne, R.J., Lin, X., Dirksen, R.T. and Thornton, C.A. (2009) Reversal of RNA dominance by displacement of protein sequestered on triplet repeat RNA. *Science*, **325**, 336-339.

Mulders, S.A., van den Broek, W.J., Wheeler, T.M., Croes, H.J., van Kuik-Romeijn, P., de Kimpe, S.J., Furling, D., Platenburg, G.J., Gourdon, G., Thornton, C.A. *et al.* (2009)

Triplet-repeat oligonucleotide-mediated reversal of RNA toxicity in myotonic dystrophy. *Proc. Natl. Acad. Sci. U. S. A.*, **106**, 13915-13920.

Holt, I., Jacquemin, V., Fardaei, M., Sewry, C.A., Butler-Browne, G.S., Furling, D., Brook, J.D. and Morris, G.E. (2009) Muscleblind-like proteins: similarities and differences in normal and myotonic dystrophy muscle. *Am. J. Pathol.*, **174**, 216-227.

Grammatikakis, I., Goo, Y.H., Echeverria, G.V. and Cooper, T.A. (2010) Identification of MBNL1 and MBNL3 domains required for splicing activation and repression. *Nucleic Acids Res.*, **39**, 2769-2780.

Santoro, M., Modoni, A., Masciullo, M., Gidaro, T., Broccolini, A., Ricci, E., Tonali, P.A. and Silvestri, G. (2010) Analysis of MTMR1 expression and correlation with muscle pathological features in juvenile/adult onset myotonic dystrophy type 1 (DM1) and in myotonic dystrophy type 2 (DM2). *Exp. Mol. Pathol.*, **89**, 158-168.

Francois, V., Klein, A.F., Beley, C., Jollet, A., Lemercier, C., Garcia, L. and Furling, D. (2011) Selective silencing of mutated mRNAs in DM1 by using modified hU7-snRNAs. *Nat. Struct. Mol. Biol.*, **18**, 85-87.

Liquori, C.L., Ricker, K., Moseley, M.L., Jacobsen, J.F., Kress, W., Naylor, S.L., Day, J.W. and Ranum, L.P. (2001) Myotonic dystrophy type 2 caused by a CCTG expansion in intron 1 of ZNF9. *Science*, **293**, 864-867.

Cardani, R., Mancinelli, E., Sansone, V., Rotondo, G. and Meola, G. (2004) Biomolecular identification of (CCTG)<sub>n</sub> mutation in myotonic dystrophy type 2 (DM2) by FISH on muscle biopsy. *Eur. J. Histochem.*, **48**, 437-442.

Savkur, R.S., Philips, A.V., Cooper, T.A., Dalton, J.C., Moseley, M.L., Ranum, L.P. and Day, J.W. (2004) Insulin receptor splicing alteration in myotonic dystrophy type 2. *Am. J. Hum. Genet.*, **74**, 1309-1313.

Schoser, B.G., Ricker, K., Schneider-Gold, C., Hengstenberg, C., Durre, J., Bultmann, B., Kress, W., Day, J.W. and Ranum, L.P. (2004) Sudden cardiac death in myotonic dystrophy type 2. *Neurology*, **63**, 2402-2404.

Margolis, J.M., Schoser, B.G., Moseley, M.L., Day, J.W. and Ranum, L.P. (2006) DM2 intronic expansions: evidence for CCUG accumulation without flanking sequence or effects on ZNF9 mRNA processing or protein expression. *Hum. Mol. Genet.*, **15**, 1808-1815.

Lucchiari, S., Pagliarani, S., Corti, S., Mancinelli, E., Servida, M., Fruguglietti, E., Sansone, V., Moggio, M., Bresolin, N., Comi, G.P. *et al.* (2008) Colocalization of ribonuclear inclusions with muscle blind like-proteins in a family with myotonic dystrophy type 2 associated with a short CCTG expansion. *J. Neurol. Sci.*, **275**, 159-163.



Cardani, R., Mancinelli, E., Giagnacovo, M., Sansone, V. and Meola, G. (2009) Ribonuclear inclusions as biomarker of myotonic dystrophy type 2, even in improperly frozen or defrozen skeletal muscle biopsies. *Eur. J. Histochem.*, **53**, 107-111.

Perdoni, F., Malatesta, M., Cardani, R., Giagnacovo, M., Mancinelli, E., Meola, G. and Pellicciari, C. (2009) RNA/MBNL1-containing foci in myoblast nuclei from patients affected by myotonic dystrophy type 2: an immunocytochemical study. *Eur. J. Histochem.*, **53**, 151-158.

Cardani, R., Mancinelli, E., Giagnacovo, M., Sansone, V. and Meola, G. (2009) Ribonuclear inclusions as biomarker of myotonic dystrophy type 2, even in improperly frozen or defrozen skeletal muscle biopsies. *Eur. J. Histochem.*, **53**, 107-111.

Tassone, F., Iwahashi, C. and Hagerman, P.J. (2004) FMR1 RNA within the intranuclear inclusions of fragile X-associated tremor/ataxia syndrome (FXTAS). *RNA Biol.*, **1**, 103-105.

Sellier, C., Rau, F., Liu, Y., Tassone, F., Hukema, R.K., Gattoni, R., Schneider, A., Richard, S., Willemsen, R., Elliott, D.J. *et al.* (2010) Sam68 sequestration and partial loss of function are associated with splicing alterations in FXTAS patients. *Embo J.*, **29**, 1248-1261.

Chen, I.C., Lin, H.Y., Lee, G.C., Kao, S.H., Chen, C.M., Wu, Y.R., Hsieh-Li, H.M., Su, M.T. and Lee-Chen, G.J. (2009) Spinocerebellar ataxia type 8 larger triplet expansion alters histone modification and induces RNA foci. *BMC Mol. Biol.*, **10**, 1-8.

Daughters, R.S., Tuttle, D.L., Gao, W., Ikeda, Y., Moseley, M.L., Ebner, T.J., Swanson, M.S. and Ranum, L.P. (2009) RNA gain-of-function in spinocerebellar ataxia type 8. *PLoS Genet.*, **5**, e1000600.

Ho, T.H., Savkur, R.S., Poulos, M.G., Mancini, M.A., Swanson, M.S. and Cooper, T.A. (2005) Colocalization of muscleblind with RNA foci is separable from mis-regulation of alternative splicing in myotonic dystrophy. *J. Cell Sci.*, **118**, 2923-2933.

Li, L.B., Yu, Z., Teng, X. and Bonini, N.M. (2008) RNA toxicity is a component of ataxin-3 degeneration in *Drosophila*. *Nature*, **453**, 1107-1111.

Wang, L.C., Chen, K.Y., Pan, H., Wu, C.C., Chen, P.H., Liao, Y.T., Li, C., Huang, M.L. and Hsiao, K.M. (2011) Muscleblind participates in RNA toxicity of expanded CAG and CUG repeats in *Caenorhabditis elegans*. *Cell. Mol. Life Sci.*, **68**, 1255-1267.

de Mezer, M., Wojciechowska, M., Napierala, M., Sobczak, K. and Krzyzosiak, W.J. (2011) Mutant CAG repeats of Huntingtin transcript fold into hairpins, form nuclear foci and are targets for RNA interference. *Nucleic Acids Res.*, **39**, 3852-3863.

Hsu, R.J., Hsiao, K.M., Lin, M.J., Li, C.Y., Wang, L.C., Chen, L.K. and Pan, H. (2011) Long tract of untranslated CAG repeats is deleterious in transgenic mice. *PLoS One*, **6**, e16417.

White, M.C., Gao, R., Xu, W., Mandal, S.M., Lim, J.G., Hazra, T.K., Wakamiya, M., Edwards, S.F., Raskin, S., Teive, H.A. *et al.* (2010) Inactivation of hnRNP K by expanded intronic AUUCU repeat induces apoptosis via translocation of PKCdelta to mitochondria in spinocerebellar ataxia 10. *PLoS Genet.*, **6**, e1000984.

Sato, N., Amino, T., Kobayashi, K., Asakawa, S., Ishiguro, T., Tsunemi, T., Takahashi, M., Matsuura, T., Flanigan, K.M., Iwasaki, S. *et al.* (2009) Spinocerebellar ataxia type 31 is associated with "inserted" penta-nucleotide repeats containing (TGGAA)<sub>n</sub>. *Am. J. Hum. Genet.*, **85**, 544-557.

Rudnicki, D.D., Holmes, S.E., Lin, M.W., Thornton, C.A., Ross, C.A. and Margolis, R.L. (2007) Huntington's disease--like 2 is associated with CUG repeat-containing RNA foci. *Ann. Neurol.*, **61**, 272-282.

Houseley, J.M., Wang, Z., Brock, G.J., Soloway, J., Artero, R., Perez-Alonso, M., O'Dell, K.M. and Monckton, D.G. (2005) Myotonic dystrophy associated expanded CUG repeat muscleblind positive ribonuclear foci are not toxic to *Drosophila*. *Hum. Mol. Genet.*, **14**, 873-883.

de Haro, M., Al-Ramahi, I., De Gouyon, B., Ukani, L., Rosa, A., Faustino, N.A., Ashizawa, T., Cooper, T.A. and Botas, J. (2006) MBNL1 and CUGBP1 modify expanded CUG-induced toxicity in a Drosophila model of myotonic dystrophy type 1. *Hum. Mol. Genet.*, **15**, 2138-2145.

Le Mee, G., Ezzeddine, N., Capri, M. and Ait-Ahmed, O. (2008) Repeat length and RNA expression level are not primary determinants in CUG expansion toxicity in Drosophila models. *PLoS One*, **3**, e1466.

Garcia-Lopez, A., Monferrer, L., Garcia-Alcover, I., Vicente-Crespo, M., Alvarez-Abril, M.C. and Artero, R.D. (2008) Genetic and chemical modifiers of a CUG toxicity model in Drosophila. *PLoS One*, **3**, e1595.
