# Supplementary material for: Cellular toxicity of expanded RNA repeats: focus on RNA foci
Source: PubMed Central journal article supplement — Hum Mol Genet. 2011 Jul 4;20(19):3811–21. doi: 10.1093/hmg/ddr299 (PMC3168290; doi:10.1093/hmg/ddr299), 2011-07-04
Supplement: supp_ddr299_ddr299supp_table2.pdf [file supp_ddr299_ddr299supp_table2.pdf]

## Supplementary Table 2

| Tissue/Cell Line/ Repeat Length                                                                                                                                                                                       | FISH RNA Probe                                                                                                                                                                                                                        | Mutant Repeat RNA Foci Characteristics                                                                                                                                                                                                                                                                                                                                                                                                                                                                                                                                                                                  | Protein Analyzed by IF and Type of Interaction with Repeat RNA Foci                                                                                                                                                                                        | Ref.              |
|-----------------------------------------------------------------------------------------------------------------------------------------------------------------------------------------------------------------------|---------------------------------------------------------------------------------------------------------------------------------------------------------------------------------------------------------------------------------------|-------------------------------------------------------------------------------------------------------------------------------------------------------------------------------------------------------------------------------------------------------------------------------------------------------------------------------------------------------------------------------------------------------------------------------------------------------------------------------------------------------------------------------------------------------------------------------------------------------------------------|------------------------------------------------------------------------------------------------------------------------------------------------------------------------------------------------------------------------------------------------------------|-------------------|
| <b>CGG–FXTAS</b>                                                                                                                                                                                                      |                                                                                                                                                                                                                                       |                                                                                                                                                                                                                                                                                                                                                                                                                                                                                                                                                                                                                         |                                                                                                                                                                                                                                                            |                   |
| isolated h. brain nuclei (frontal cortex) (113 CGG)                                                                                                                                                                   | biotinylated riboprobes targeting coding (~1.1 kb), 5' UTR with CGG repeat (~0.3 kb) and 3'UTR (~2 kb) of FMR1 RNA                                                                                                                    | A single-spot nuclear signal of enlarged size with either of the antisense probes; 6-11% of probed nuclei had inclusions: 28 out of 507 nuclei were 5'UTR probe positive, 42 out of 466 were positive for coding probe and 50 out of 471 nuclei were 3'UTR probe positive                                                                                                                                                                                                                                                                                                                                               | NA                                                                                                                                                                                                                                                         | Tassone F 2004    |
| h. FXTAS brain (hippocampal area); KI mouse brain (98 CGG); kidney COS7, ovarian A172, neuronal PC12 and m. neurons primary cells were transfected with plasmids expressing (CGG) <sub>n</sub> (n=20, 40, 60 and 100) | (CCG) <sub>8</sub> -Cy3                                                                                                                                                                                                               | Large, dynamic CGG nuclear aggregates with endogenously expressed CGG repeats; foci with as few as 40 exogenous CGG; foci expand over time; not all transfected cells support foci formation: foci in PC12, ovarian (SKOV3 and SW626) and COS7; no foci in A172, U-937, THP1, HeLa, HEK293, NG108-15, IMR-32, Neuro-2a, SH-SY5Y, SK-N-MC and in SK-N-SH cells                                                                                                                                                                                                                                                           | Sam68 colocalize with CGG foci; hnRNP G, SLM1, SLM2, hnRNP A, Tra2β and MBNL1 proteins are recruited within CGG aggregates by interaction with Sam68; PML, coilin, SC35 colocalize partially with CGG foci                                                 | Sellier C 2010    |
| <b>CUG–SCA8</b>                                                                                                                                                                                                       |                                                                                                                                                                                                                                       |                                                                                                                                                                                                                                                                                                                                                                                                                                                                                                                                                                                                                         |                                                                                                                                                                                                                                                            |                   |
| HEK293 cells expressing ATXN8OS CR with 23, 88 and 157 combined CTA and CTG repeats                                                                                                                                   | Cy3-(CAG)10<br>Cy5-ATXN8OS unique sequence                                                                                                                                                                                            | Distinct, mostly perinuclear foci in 88 and 157 ATXN8OS CR cells (results of both probes); no foci in 23 CR cell line                                                                                                                                                                                                                                                                                                                                                                                                                                                                                                   | NA                                                                                                                                                                                                                                                         | Chen I-Ch 2009    |
| h. brain tissue (cerebellum); SCA8 BAC Tg mouse model (116 CTG) (cerebellum)                                                                                                                                          | Cy5-(CAG)10                                                                                                                                                                                                                           | CUG foci in h. cerebellar cortical layers; foci varied in distribution, size and number between analyzed cases; in a case with 1000 and 400 CTG single foci are found in the nuclei of molecular layer interneurons and the Bergmann glia surrounding the Purkinje cells in the granule cell layer; in a case with 109 CTG, foci are not reproducibly found and are only detected in a single molecular layer interneuron; CUG foci are readily detected in BAC mice with 116 repeats and have similar distribution in the cerebellar cortex as in SCA8 h. brain with 400 and 1000 repeats; no foci in mice with 11 CTG | CUG foci colocalize with MBNL1 in h. cerebellar sections (molecular layer interneurons); MBNL1 is not found in foci in SCA8 and DM1 Purkinje cells where MBNL1 is predominantly expressed in the cytoplasm, the same results are found in SCA8 Tg BAC mice | Daughters RS 2009 |
| <b>CAG EXPRESSING CELLS</b>                                                                                                                                                                                           |                                                                                                                                                                                                                                       |                                                                                                                                                                                                                                                                                                                                                                                                                                                                                                                                                                                                                         |                                                                                                                                                                                                                                                            |                   |
| DM1 fibroblasts (GM3132-2000CTG and GM03987-500CTG); COSM6 expressing 960 interrupted CTG and CAG in exon 15 of truncated <i>DMPK</i>                                                                                 | Cy3-PNA-(CAG)5<br>Cy3-PNA-(CTG)5                                                                                                                                                                                                      | Punctate CUG and CAG RNA foci are formed in COSM6 cells and in C2C12 myoblasts, NIH 3T3 fibroblasts and HeLa cells; similar number of foci/nucleus is formed with CTG and CAG expansions (~11 CAG and 13 CUG RNA foci) in COSM6                                                                                                                                                                                                                                                                                                                                                                                         | Endogenous (41 and 42 kDa) and exogenous MBNL1 (41 kDa) colocalize with CUG and CAG RNA foci in COSM6                                                                                                                                                      | Ho TH 2005        |
| Tg SCA3 <i>Drosophila</i> expressing pure (CAG)100 and (CAG)250 and interrupted (CAG)78                                                                                                                               | FITC-(CAG)7<br>FITC-(CUG)7                                                                                                                                                                                                            | Robust CUG RNA foci with 250 repeats; smaller foci in a limited number of nuclei with 250 CAG repeats                                                                                                                                                                                                                                                                                                                                                                                                                                                                                                                   | NA                                                                                                                                                                                                                                                         | Li L-B 2008       |
| Tg <i>Caenorhabditis elegans</i> expressing 5,30,83,125 and 200 CAG and CTG repeat                                                                                                                                    | Cy3-(CAG)10<br>Cy3-(CTG)10                                                                                                                                                                                                            | CAG125 and CUG125 repeats form nuclear foci in the worm muscle                                                                                                                                                                                                                                                                                                                                                                                                                                                                                                                                                          | CeMBL colocalize with CAG and CUG foci and 92% of CAG RNA foci and 60% of CUG RNA foci are enriched with CeMBL                                                                                                                                             | Wang LC 2011      |
| h. HD fibroblasts GM04281(68 CAG) and GM09197 (151 CAG)                                                                                                                                                               | Cy3-LNA-(CTG)6-CA                                                                                                                                                                                                                     | Numerous nuclear CAG RNA aggregates with CAG 68 and 151 repeats                                                                                                                                                                                                                                                                                                                                                                                                                                                                                                                                                         | MBNL1 colocalize with CAG RNA foci                                                                                                                                                                                                                         | de Mezer M 2011   |
| Tg mouse model expressing 23 and 200 CAG repeat; C2C12 expressing 58 and 200 CTG and CAG repeats                                                                                                                      | Cy3-(CTG)13<br>Cy3-(CAG)13                                                                                                                                                                                                            | Punctate nuclear foci in m. skeletal muscle expressing 200 CAG but not 13 repeats; CUG and CAG RNA foci in C2C12 expressing 58 and 200 repeats and the proportion of nuclei with foci similar among CAG58, CAG200 and CUG200, 13.6%, 17.4% and 13.1%; respectively, number of foci/nucleus higher in CAG200 and CUG200 than in CAG58, 6.7, 6.5 and 3.4, respectively                                                                                                                                                                                                                                                    | Endogenous Mbnl1 colocalize with CAG RNA foci in mice and with CAG and CUG RNA foci in m. myoblasts                                                                                                                                                        | Hsu RJ 2011       |
| <b>AUUCU–SCA10</b>                                                                                                                                                                                                    |                                                                                                                                                                                                                                       |                                                                                                                                                                                                                                                                                                                                                                                                                                                                                                                                                                                                                         |                                                                                                                                                                                                                                                            |                   |
| h. fibroblasts (1000 and 2000 ATTCT); Tg mouse brain (500 ATTCT); h. Sy5y cells and h. fibroblasts (ectopically expressing 500 ATTCT)                                                                                 | Cy3-(AGAAU) <sub>10</sub>                                                                                                                                                                                                             | Large number of nuclear and cytoplasmic AUUCU RNA aggregates (fibroblasts; m. brain, Sy5y cells); aggregates are more abundant in 6-month-old than in 3-month-old mice; no aggregates in Sy5y expressing 12-25 AUUCU repeats                                                                                                                                                                                                                                                                                                                                                                                            | hnRNP K colocalizes with cytoplasmic and nuclear AUUCU RNA aggregates                                                                                                                                                                                      | White MC 2010     |
| <b>UGGAA–SCA31</b>                                                                                                                                                                                                    |                                                                                                                                                                                                                                       |                                                                                                                                                                                                                                                                                                                                                                                                                                                                                                                                                                                                                         |                                                                                                                                                                                                                                                            |                   |
| h. brain (cerebellar cortex)                                                                                                                                                                                          | DIG-LNA-(TTTTATTCTA) <sub>2.5</sub> and (TAGAATAAAA) <sub>2.5</sub>                                                                                                                                                                   | RNA foci in Purkinje cells with (TTTTATTCTA) <sub>2.5</sub> probe targeting sense (UAAAAUAGAA) <sub>n</sub> transcript; 30-50% nuclei have foci (Purkinje cells); antisense transcript searched with (TAGAATAAAA) <sub>2.5</sub> probe does not appear as foci                                                                                                                                                                                                                                                                                                                                                          | NA                                                                                                                                                                                                                                                         | Sato N 2009       |
| <b>CUG–HDL2</b>                                                                                                                                                                                                       |                                                                                                                                                                                                                                       |                                                                                                                                                                                                                                                                                                                                                                                                                                                                                                                                                                                                                         |                                                                                                                                                                                                                                                            |                   |
| h. brain tissue (44–55 CTG); HEK293 and HT22 cells ectopically expressing (CTG)53 from <i>JPH3</i> gene                                                                                                               | T.Red-2-O-Me-(CAG) <sub>20</sub><br>biotin-O-Me RNA 43mer targeting 3' to the <i>JPH3</i> CUG repeat (exon 2A)<br>biotin-RNA 25mer targeting exon 2B of the <i>JPH3</i><br>DIG-2-O-Me-RNA 26mer targeting intron 1 of the <i>JPH3</i> | CUG RNA foci are detected with CAG probe; signals of CAG probe colocalize with 43mer probe and 25mer probe; less consistent colocalization is found with 26mer probe; 30% neurons (frontal cortex) have 1-13 CUG foci/nucleus; 15-20% neurons (striatum) have 5-20 foci/nucleus, and foci are bigger and brighter than in cortex; in hippocampus and dentate nuclei of cerebellum foci in <5% neurons; cells with 44 CTG fewer foci than with longer repeats; foci in HEK293 expressing 53 CUG but not 11 repeats                                                                                                       | MBNL1 colocalizes with CUG RNA foci in frontal cortex and in HEK293 expressing 53 CUG repeats; CUGBP1 (no colocalization)                                                                                                                                  | Rudnicki DD 2007  |
