# Supplementary material for: Cellular toxicity of expanded RNA repeats: focus on RNA foci
Source: PubMed Central journal article supplement — Hum Mol Genet. 2011 Jul 4;20(19):3811–21. doi: 10.1093/hmg/ddr299 (PMC3168290; doi:10.1093/hmg/ddr299), 2011-07-04
Supplement: supp_ddr299_ddr299supp_table3.pdf [file supp_ddr299_ddr299supp_table3.pdf]

### Supplementary Table 3

| Tissue/Cell Line/CTG Length                                                                                                   | RNA FISH Probe                 | Mutant Repeat RNA Foci Characteristics                                                                                                                                                                                                                                                                                                                                                                                                                                                                                                                                                                                                                                                                                                                                                                                                                                                                                                                  | Protein Analyzed by IF and Type of Interaction with Repeat RNA Foci                                                                                                                                                                                                                                                                                                                                           | Ref.                |
|-------------------------------------------------------------------------------------------------------------------------------|--------------------------------|---------------------------------------------------------------------------------------------------------------------------------------------------------------------------------------------------------------------------------------------------------------------------------------------------------------------------------------------------------------------------------------------------------------------------------------------------------------------------------------------------------------------------------------------------------------------------------------------------------------------------------------------------------------------------------------------------------------------------------------------------------------------------------------------------------------------------------------------------------------------------------------------------------------------------------------------------------|---------------------------------------------------------------------------------------------------------------------------------------------------------------------------------------------------------------------------------------------------------------------------------------------------------------------------------------------------------------------------------------------------------------|---------------------|
| <b>CUG-DM1</b>                                                                                                                |                                |                                                                                                                                                                                                                                                                                                                                                                                                                                                                                                                                                                                                                                                                                                                                                                                                                                                                                                                                                         |                                                                                                                                                                                                                                                                                                                                                                                                               |                     |
| Tg <i>Drosophila</i> expressing 11, 48, 56 and 162 CTG in the context of truncated human DMPK 3'UTR                           | Cy3-(CAG) <sub>10</sub>        | CUG foci in flies ubiquitously expressing CUG162 but not 11, 48 and 62 repeats; foci not detectable in the embryo but present in the muscle of first instar larvae; number and intensity of foci increase throughout the development of the larval stages and numerous intense foci are formed in late third instar muscle cells; number of foci-positive cells decreases during pupation when muscle remodels; in adults foci are restricted to abdominal, cranial and pleurosternal muscles and are absent in legs and indirect flight muscle cells; foci are found in nuclei of the salivary glands from larvae to adults; foci are not found in the brain, peripheral nervous system and internal organs thus, expression of expanded CUG repeat is not sufficient to drive foci formation, indicating a requirement for cell type-specific factors; CUG foci are dynamic and transient structures of a short half-life that is cell-type dependent | CUG foci colocalize with <i>Drosophila</i> Mbl and non-A proteins; no CUG foci colocalization with proteosomal, spliceosomal or exosomal markers; expression of Mbl in muscle, salivary gland and imaginal discs correlates with foci formation; in larval imaginal discs and adult indirect flight muscle despite Mbl expression foci are not observed; Mbl is not found in foci induced in non-muscle cells | Houseley JM 2005    |
| Tg <i>Drosophila</i> expressing 480 interrupted CTG repeats (iCUG) <sub>480</sub> : [(CUG) <sub>20</sub> CUCGA] <sub>24</sub> | Cy3-(CAG) <sub>5</sub>         | CUG foci formed in all nuclei of third instar larval muscles; higher percentage of nuclei with single foci than with multiple, average number of foci/nucleus decreases in MBNL1 overexpressing DM1 flies; overexpression of CUGBP1 causes elevation of the percentage of nuclei with multiple foci as compared with (iCUG) <sub>480</sub> flies                                                                                                                                                                                                                                                                                                                                                                                                                                                                                                                                                                                                        | MBNL1 localizes to CUG foci; CUGBP1 does not colocalize with the RNA foci                                                                                                                                                                                                                                                                                                                                     | de Haro M 2006      |
| Tg inducible <i>Drosophila</i> expressing 16 CTG and 240 and 480 interrupted CTG                                              | FITC-(CAG) <sub>6</sub> C-FITC | CUG240 and CUG480 form single nuclear foci in salivary glands, whereas in larval muscle cells of third instar larvae and ovarian nurse cells, CUG mutants form several foci of variable size and shape; no foci in flies with CUG16                                                                                                                                                                                                                                                                                                                                                                                                                                                                                                                                                                                                                                                                                                                     | NA                                                                                                                                                                                                                                                                                                                                                                                                            | Le Mee GL 2008      |
| Tg <i>Drosophila</i> expressing 60 pure CTG and 480 interrupted CTG (iCUG) <sub>480</sub>                                     | Cy3-(CAG) <sub>10</sub>        | foci in flies expressing iCUG480; no foci in CUG60                                                                                                                                                                                                                                                                                                                                                                                                                                                                                                                                                                                                                                                                                                                                                                                                                                                                                                      | iCUG480 RNA foci colocalize with the MbIC isoform when co-expressed, no colocalization when the two constructs are expressed alone                                                                                                                                                                                                                                                                            | Garcia-Lopez A 2008 |
